# Supplementary material
Source: PubMed Central journal article supplement (PMC1914116)
Supplement: plntphys_pp.107.098988_1.pdf [file plntphys_pp.107.098988_1.pdf]

## SUPPLEMENTAL DATA

**Supplementary Table S1:** Descriptive statistics and population genetic parameters for 30 maize candidate agronomic loci and 15 reference loci in maize inbred lines, landraces and teosintes.

**Supplementary Table S2:** PlantGDB cDNA libraries, normalization status (N:normalized, UN: non-normalized), and corresponding maize tissues used in e-northern screens of maize candidate neutral and selected loci.

**Supplementary Table S3:** Electronic northern results based on comparisons of 658 neutral loci and 48 selected loci in *Zea mays* ssp. *mays* with the PlantGDB mRNA EST database as of April 20, 2006.
